1                   **The gut microbiota affects the social network of honeybees**  
2       Joanito Liberti<sup>1,2§\*</sup>, Tomas Kay<sup>1§</sup>, Andrew Quinn<sup>2</sup>, Lucie Kesner<sup>2</sup>, Erik T. Frank<sup>1,3</sup>, Amélie  
3                   Cabirol<sup>2</sup>, Thomas O. Richardson<sup>1</sup>, Philipp Engel<sup>2†\*</sup>, and Laurent Keller<sup>1†\*</sup>

4

5   **Affiliations:**

6   <sup>1</sup>Department of Ecology and Evolution, University of Lausanne, Switzerland

7   <sup>2</sup>Department of Fundamental Microbiology, University of Lausanne, Switzerland

8   <sup>3</sup>Department of Animal Ecology and Tropical Biology, University of Würzburg, Germany

9

10   §Shared first authorship

11   †Equally contributing senior authors

12   \*To whom correspondence should be addressed.

13   e-mail: joanito.liberti@unil.ch, laurent.keller@unil.ch, philipp.engel@unil.ch

## 14 **Abstract**

15

16 The gut microbiota influences animal neurophysiology and behavior but has not previously  
17 been documented to affect emergent group-level behaviors. Here we combine gut microbiota  
18 manipulation with automated behavioral tracking of honeybee sub-colonies to show that the  
19 microbiota increases the rate and specialization of social interactions. Microbiota  
20 colonization was associated with higher abundances of one third of metabolites detected in  
21 the brain, including several amino acids, and a subset of these metabolites were significant  
22 predictors of social interactions. Colonization also affected brain transcriptional processes  
23 related to amino acid metabolism and epigenetic modification in a brain region involved in  
24 sensory perception. These results demonstrate that the gut microbiota modulates the emergent  
25 colony social network of honeybees, likely via changes in chromatin accessibility and amino  
26 acid biosynthesis.

27

28

## 29 **Main**

30

31 Understanding which factors regulate the organization of animal societies is a long-standing  
32 goal of biological research (1). While various genetic and ecological factors have been  
33 associated with the diversity of social organization across the animal kingdom (2-5), much  
34 less is known about the role of symbiotic interactions with the gut microbiota, which is  
35 increasingly recognized as an important modulator of neurophysiology. Bacterial metabolites  
36 and signals produced in the gut can reach the brain and elicit local host responses that affect  
37 the host nervous system (6-8). There is also accumulating evidence linking the gut  
38 microbiome to social behavior and its dysfunctions (9-12). However, effects on social  
39 behavior have typically been investigated during one-to-one encounters between gnotobiotic  
40 animals, and in model organisms that do not naturally express complex social structure (7, 8,  
41 13-17). Whether and how the diversity of gut microbes hosted by individual animals  
42 influences the emergent properties of group living remains unknown.

43

44 To address this question, we performed controlled laboratory experiments with honeybees,  
45 which live in complex societies and exhibit division of labor among colony members (18,  
46 19). In these societies, individuals follow simple decision-making strategies to produce  
47 elaborate social phenotypes at the colony-level. Honeybees provide a powerful model to  
48 explore how the gut microbiota affects group-level social phenotypes for several reasons.  
49 First, they exhibit complex but experimentally tractable social behavior (20, 21). Second,  
50 they have a well-characterized and evolutionarily stable gut microbiota comprising relatively  
51 few species (22-24). Third, the composition of this community can be manipulated and the  
52 resulting gnotobiotic bees (i.e., with defined microbiota) studied under controlled lab  
53 conditions (16, 23, 24). Finally, the gut microbiota has been shown to affect hormonal  
54 signaling, gene expression of insulin-like peptides in the head, and sugar intake (25),  
55 indicating substantial crosstalk between the gut and the brain along what is referred to as the  
56 gut-brain axis.

57

58 To investigate the influence of the gut microbiota on bee behavior and colony social  
59 organization we produced gnotobiotic bees to be either microbiota-depleted (MD) or  
60 colonized with a homogenate of five nurse bee guts (CL) reconstituting the natural gut  
61 microbiota (25-27). We used an automated behavioral tracking system (28, 29) to monitor  
62 social interactions for a week in nine pairs of sub-colonies of ~100 three-day-old worker bees  
63 (Fig. 1A and B and Supplementary Movie 1). The microbiota treatment led to clear  
64 differences in the abundance and taxonomic composition of the gut bacterial communities

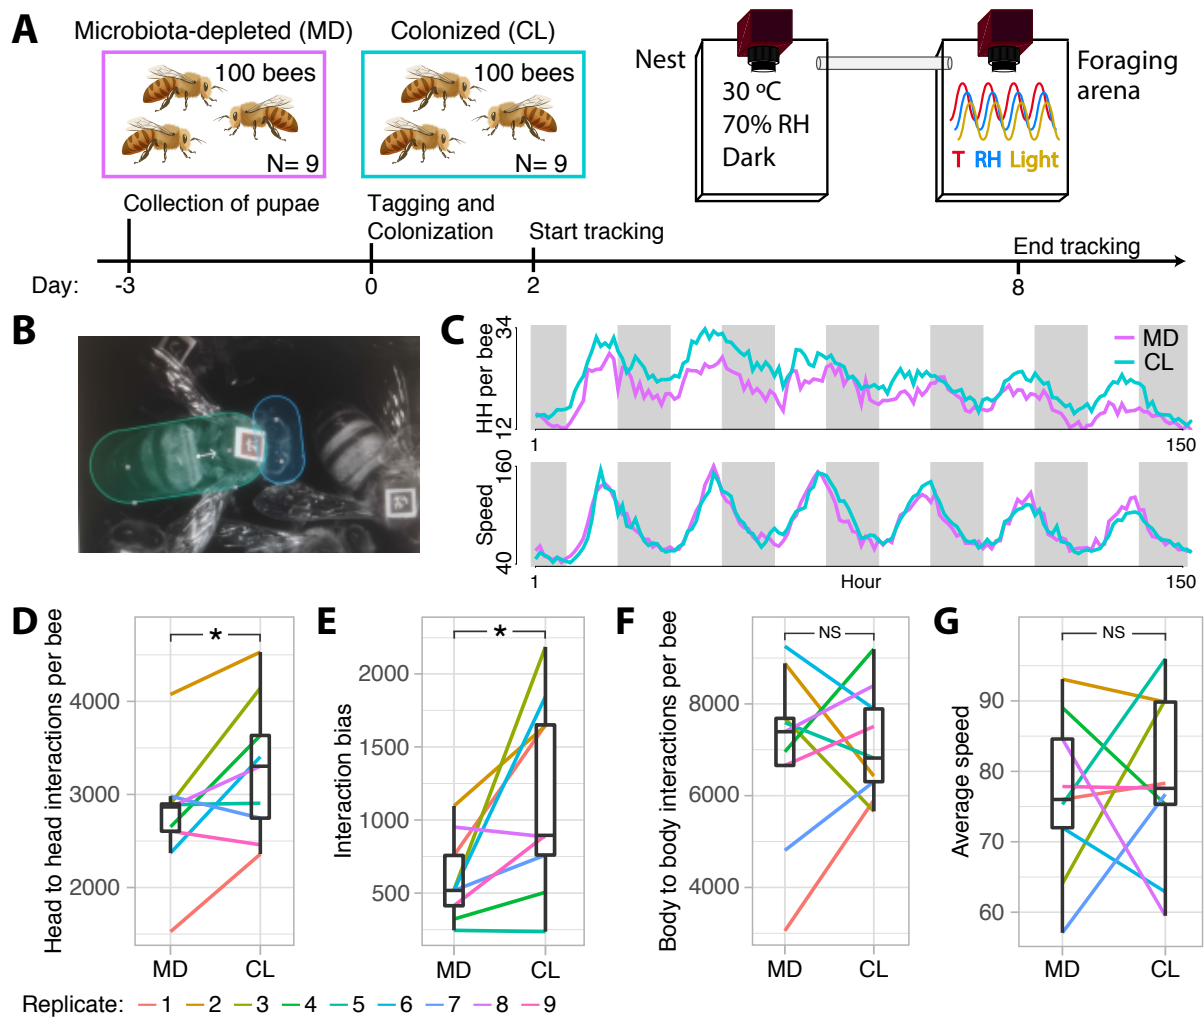

65

66

67

68

69

70

71

72

73

74

75

76

77

78

79

80

81

82

83

84

85

86

87

88

89

90

**Figure 1: The gut microbiota affects honeybee social behavior.** (A) Experimental design and timeline for a single experimental replicate. Gnotobiotic bees were produced by rearing pupae in an incubator and colonizing them with their treatment solution as newly emerged adults. Each sub-colony of ~100 bees could move freely between two plexiglas boxes hosted within separate climate-controlled chambers. Social interactions were quantified by monitoring the orientation and position of individual tags glued onto the thorax of each bee and (B) counting overlaps between ellipses drawn over the bees' heads and bodies. (C) Line plots showing the number of head to head interactions (HH per bee) and average speed per hour during 152 h of tracking averaged across all experimental replicates, and colored by gut microbiota treatment. White and grey shading represent day and night, respectively. (D) Average number of head to head interactions per bee for each sub-colony during the week of tracking. (E) Interaction bias, representing average variance in head to head interactions per bee per sub-colony. (F) Average number of body to body contacts per bee per sub-colony. (G) Average speed per bee per sub-colony. Lines connect paired colonies in each experimental replicate. Box plots show the median and first and third quartiles. Whiskers show the extremal values within 1.5 times the interquartile ranges above the 75th and below the 25th percentile. \*  $P < 0.05$ , NS = not significant.

(Figs. S1 and S2; Permutational multivariate analysis of variance (PERMANOVA) using Bray-Curtis dissimilarities calculated from a matrix of absolute abundances of amplicon sequence variants (ASVs):  $F_{1,179}=65.99$ ,  $R^2=0.27$ ,  $P < 0.001$ ). Bees in both treatments had a circadian rhythm and a pattern of interactions reflecting natural behavior (Figs. 1C and S3). The microbiota treatment had a significant effect on behavior, with CL bees having a higher rate of head to head interactions than MD bees (Fig. 1C and D; paired  $t$ -test:  $t=2.82$ ,  $df=8$ ,  $P=0.02$ ). CL bees also exhibited a much higher degree of specialization (measured by the standard deviation in edge-weight per node in the social network) than MD bees (Fig. 1E; paired  $t$ -test:  $t=2.93$ ,  $df=8$ ,  $P=0.02$ ) suggesting that CL bees formed stronger social ties with

91 specific subsets of nestmates, while MD bees interacted more randomly within the colony.  
92 Importantly, these differences did not simply reflect a treatment effect on overall activity  
93 level. First, there was no significant difference between CL and MD bees in the rate of  
94 contacts (interactions not involving the head of bees) (Fig. 1F; paired  $t$ -test:  $t=0.32$ ,  $df=8$ ,  
95  $P=0.76$ ). Second, CL and MD bees exhibited similar movement patterns (average speed and  
96 within-individual variation in speed; Figs. 1G and S4A). And third, the gut microbiota had no  
97 significant effect on survival (Fig. S4B; paired  $t$ -test:  $t=1.10$ ,  $df = 8$ ,  $P=0.30$ ). Hence, these  
98 results suggest that the gut microbiota specifically promotes and structures social interactions.  
99

100 To probe how the microbiome may affect social behavior, we analyzed soluble metabolites in  
101 the brain and hemolymph of a random subset of bees across the experimental replicates  
102 (brain,  $n=167$ ; hemolymph,  $n=159$ ). More than a third (21/60) of the metabolites detected in  
103 the brain differed significantly in abundance between MD and CL bees (BH-adjusted  $P<0.05$ )  
104 (Fig. 2A and Table S1). Strikingly, all of the differently abundant metabolites were more  
105 abundant in CL than in MD bee brains, and there was an over-representation of amino acids  
106 and intermediates of amino acid metabolism (Fig. 2C and Table S2; Fisher exact test,  $P=$   
107  $0.031$ ). CL bees had a higher abundance of three out of the six essential and eight out of the  
108 15 non-essential amino acids (30), as well as three out of the seven metabolites linked to  
109 amino acid metabolism (Fig. 2C and Table S2). Several of the differently abundant amino  
110 acids (e.g. serine, glutamine, aspartate, glycine) have known roles in synaptic transmission  
111 and brain energetic function (31, 32). This pattern in the brain contrasted with that of the  
112 hemolymph, where less than 8% (6/76) of the metabolites were significantly differently  
113 abundant between MD and CL bees, including three that were also differently abundant in the  
114 brain (glutamine, 5-oxoproline, and an unidentified metabolite; Fig. 2B).

115  
116 Five of the 21 metabolites that were more abundant in brains of CL bees were significant  
117 predictors of the number of head to head interactions (Fig. 2D and Table S3; 3-amino-2-  
118 piperidone, ornithine, serine, B-alanine and myo-inositol;  $n=161$ , linear mixed-effects models  
119 fitted by REML with replicate as random effect, BH-adjusted  $P<0.05$ ). Four other  
120 metabolites (phosphorylethanolamine, tyrosine and two identified as glycerol-3-phosphate)  
121 were also predictors of the rate of head to head interactions although their concentrations  
122 were not significantly different between CL and MD bees (Fig. 2D and Table S3). By  
123 contrast, none of the 76 hemolymph metabolites were significant predictors of the number of  
124 head to head interactions (Table S3;  $n=153$ , linear mixed-effects models fitted by REML with  
125 replicate as random effect, all BH-adjusted  $P>0.05$ ). These findings suggest that the gut  
126 microbiota specifically increases the abundance of brain metabolites, which could be due to  
127 bacterial signals received from the gut or the direct transfer of microbial or dietary-derived  
128 metabolites from the gut to the brain. The latter seems likely for the three metabolites found  
129 to be more abundant in both the brain and the hemolymph of CL bees (a pattern consistent  
130 with transfer from the gut to the brain), and for essential amino acids, which the honeybee  
131 lacks the ability to produce (33).

132  
133 We next investigated the effect of the gut microbiota on gene expression in the gut and three  
134 macro-regions of the brain that are broadly responsible for learning and memory (mushroom  
135 bodies, MB), perception of olfactory and gustatory stimuli (antennal lobe and suboesophageal  
136 ganglion, AL), and visual processing (optic lobes, OL) (Fig. 3A). As in the previous  
137 experiments, we reared sub-colonies ( $N=10$ ) of either ~20 CL or MD bees. From each sub-  
138 colony we randomly sampled a single bee for gene expression (to avoid cage effects, see  
139 Materials and Methods) and two-three additional bees for gut microbiota analyses. We  
140 included two additional treatments (also  $N=10$ ) where bees were colonized with a synthetic

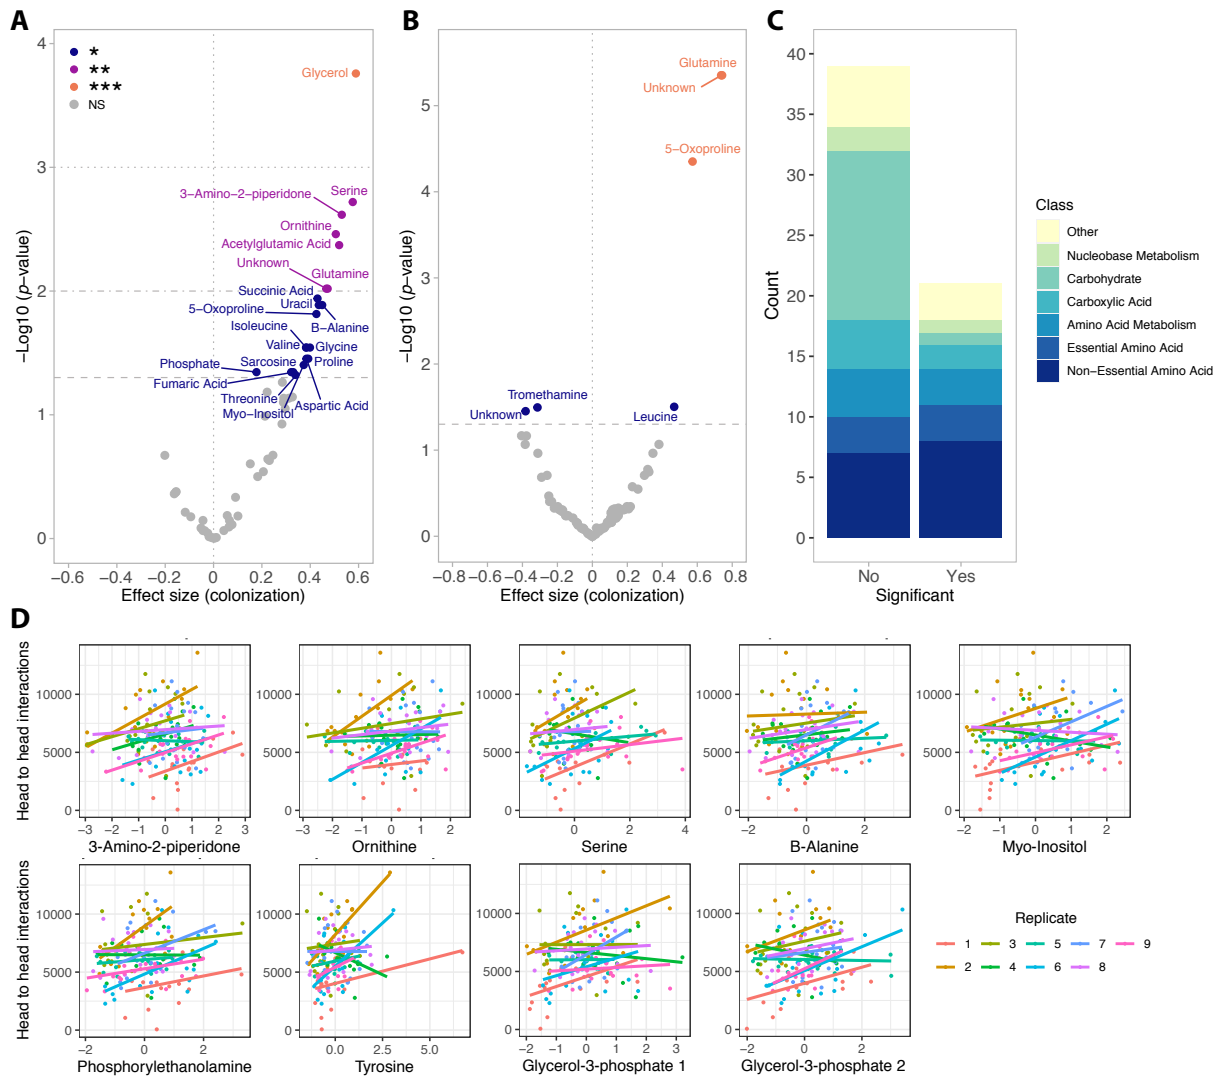

141  
 142  
 143 **Figure 2: The gut microbiota increases the abundance of brain metabolites.** Volcano plots present  
 144 significance ( $-\log_{10}(P \text{ value})$ ) versus effect size of linear mixed effects models for all soluble metabolites  
 145 identified in the brain (A) and hemolymph (B) of tracked bees. Positive effect sizes indicate metabolites that  
 146 were more abundant in the brains of CL bees than in those of MD bees.  $P$  values were corrected for multiple  
 147 testing with the BH method. \*\*\*  $P < 0.001$ , \*\*  $P < 0.01$ , \*  $P < 0.05$ , NS = not significant. (C) Stacked bars show  
 148 the relative proportion of metabolites based on functional classification and plotted separately based on  
 149 significance in differential abundance tests. (D) Regressions between metabolite abundance (z-score) and the  
 150 number of head to head interactions of each bee for the nine metabolites that were significant predictors in linear  
 151 mixed-effects models. Regression lines are colored by experimental replicate. The top row presents the  
 152 metabolites that were also significantly differently abundant between MD and CL bees, the bottom row presents  
 153 the four that were not.

154  
 155 community of 13 strains covering most phylotypes of the honeybee gut microbiota (CL\_13;  
 156 Table S4), or with only *Bifidobacterium asteroides*, which is thought to have  
 157 neuromodulating potential (CL\_Bifi; (26)). Seven days after inoculation, the gut microbiota  
 158 clearly differed as expected between the four treatments (Figs. S5 and S6; PERMANOVA  
 159 using Bray-Curtis dissimilarities calculated from a matrix of absolute ASV abundances:  
 160  $F_{3,120}=50.80$ ,  $R^2=0.56$ ,  $P < 0.001$ ). In the gut, a total of 4,988 bee genes (40% of the  
 161 transcriptome) were differentially expressed between MD and the three types of CL bees (See  
 162 Materials and Methods; Figs. 3B, and S7 and Table S5). Colonization with only *B. asteroides*  
 163 recapitulated a considerable subset of the changes associated with full colonization: more  
 164 than a quarter (1267/4753) of the genes differentially expressed between MD and one or both



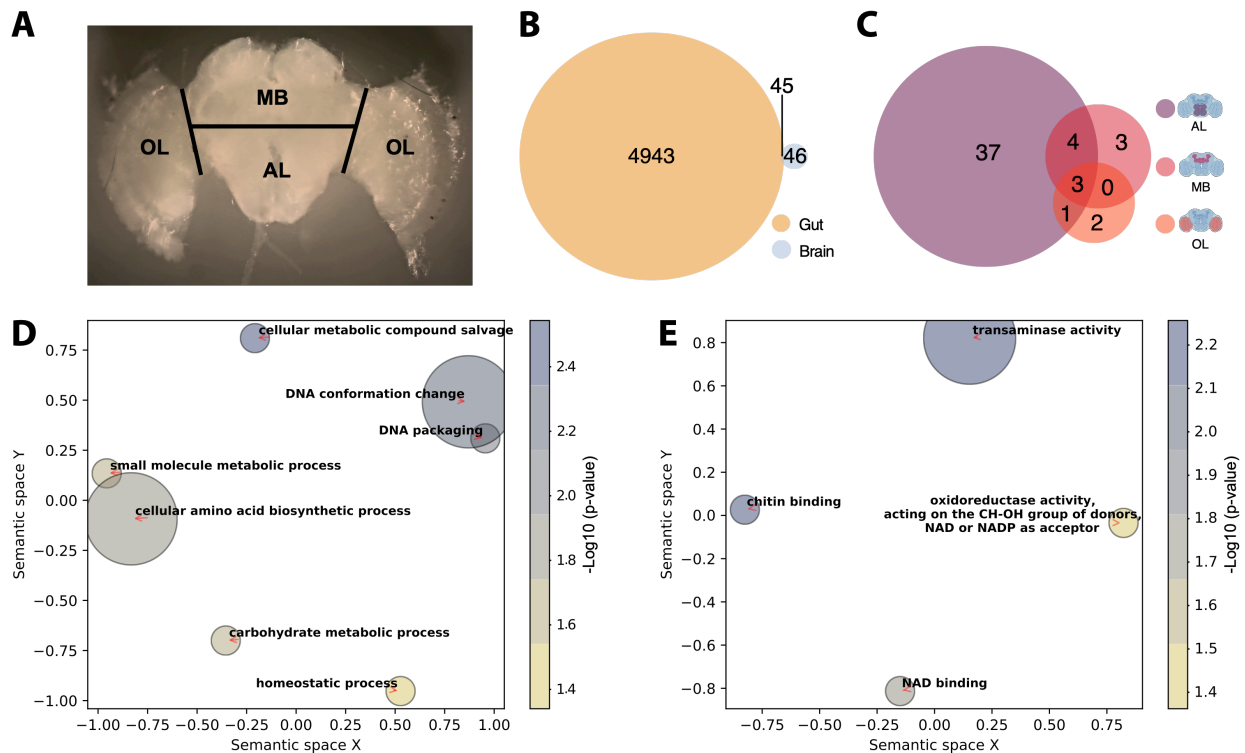

165  
166  
167  
168  
169  
170  
171  
172  
173  
174  
175  
176  
177

**Figure 3: The gut microbiota alters gene expression in the gut and in the AL brain region.** (A) Brain regions dissected for RNA sequencing. Black lines indicate the performed incisions. (B) Venn diagram reporting overlap in differentially expressed genes in the gut and brain across all contrasts of gut microbiota colonization treatments (CL, CL\_13, and CL\_Bifi) versus microbiota-depleted (MD) controls. (C) Venn diagram reporting overlap in brain-region-specific contrasts of all gut microbiota colonization treatments (CL, CL\_13, and CL\_Bifi) versus microbiota-depleted (MD) controls. Semantic similarity scatterplots summarize the list of enriched (D) Biological process and (E) Molecular function GO terms of all the 91 DEGs identified the brain. The scatterplots show GO terms as circles arranged such that those that are most similar in two-dimensional semantic space are placed nearest to each other. Circle color represents  $-\log_{10}$  of enrichment  $P$  value.

178  
179  
180  
181

of CL and CL\_13 were also differently expressed between MD and CL\_Bifi (Fig. S8). Moreover, only 15 genes were differentially expressed only between MD and CL\_Bifi bees (Fig. S8).

182  
183  
184  
185  
186  
187  
188  
189  
190  
191  
192  
193  
194  
195  
196  
197

In contrast to the widespread changes in the gut, the microbiota affected the expression of relatively few genes in the brain. Only 91 genes were differentially expressed between MD bees and bees of any of the three colonization treatments (Fig. 3B and Table S6). The proportion of these genes (45/91) that were also differentially expressed in the brain was greater than expected by chance (Fig. 3B; Hypergeometric test: representation factor = 1.23,  $P=0.047$ ). The AL was the brain region with the greatest number of genes affected by the gut microbiota (Figs. 3C and S9 and Table S6). Consistent with our metabolomic analyses, the differentially expressed genes were mainly enriched for Gene Ontology terms related to amino acids and their metabolism (Fig. 3D and E and Table S7). Other enriched terms were related to the epigenetic regulation of chromosome packaging and conformation (Fig 3D and E and Table S7). The antennal lobes process information from the antennae, while the suboesophageal ganglion processes gustatory stimuli. Hence, our gene expression results together with our behavioral findings suggest that the gut microbiota increases social tendency by modulating chromatin accessibility and amino acid biosynthesis and metabolism in areas of the brain implicated in the perception of sensory stimuli. Previous work in mice also found that the gut microbiota affects amino acid metabolism in the host brain (34),

198 suggesting that the mediation of the gut-brain axis via amino acid metabolism may be deeply  
199 conserved. In the brain, amino acids act as neurotransmitters, regulators of energy  
200 metabolism and neuromodulators, and imbalances are associated with neurodegeneration  
201 (35).

202

203 In conclusion, our study shows that the gut microbiota affects the rate of social interactions  
204 and the social network structure of honeybees. These behavioral differences are associated  
205 with important changes in gene expression and metabolite abundance in the brain. Our results  
206 demonstrate crosstalk between the gut microbiota and amino acid metabolism, particularly  
207 across the antennal lobes and the subesophageal ganglion, the brain regions associated with  
208 perception of olfactory and gustatory stimuli (36, 37). Because changes in the rate and  
209 patterning of social interaction probably impact information and nutrient flow within  
210 colonies, our study highlights the importance of the gut microbiome for the complex social  
211 lives of honeybees.

212

213

## 214 **Materials and Methods**

215

### 216 Preparation of bacterial inocula to colonize microbiota-depleted bees

217 We produced three kinds of inocula: (i) a homogenate of five pooled guts of nurse bees  
218 collected from a single hive (CL treatment), (ii) an artificial community reconstituted from 13  
219 cultured strains spanning the major phylotypes and SDPs (26, 38) of the honeybee gut  
220 microbiota (CL\_13 treatment; Table S4), and (iii) an inoculum containing two cultured  
221 strains of *Bifidobacterium asteroides* (CL\_Bifi treatment; Table S4).

222

223 To prepare the inoculum for the CL treatment, we collected five nurse bees from each of  
224 three hives and bead-beat their guts in 1 ml 1x PBS with 0.75 - 1 mm sterile glass beads using  
225 a FastPrep-24 5G homogenizer (MP Biomedicals) at 6 m/s for 45 s. We pooled the five gut  
226 homogenates by hive of origin, and plated a serial dilution of these pools from  $10^{-3}$  -  $10^{-12}$   
227 onto BHIA, CBA + blood and MRSA + 0.1% L-cys + 2% fructose using the drop method (10  
228  $\mu$ l droplets). These plates were then incubated in both anaerobic and microaerophilic  
229 conditions to confirm bacterial growth prior to inoculations. To select the most pathogen-  
230 depleted of these three homogenates for subsequent colonizations, we performed diagnostic  
231 PCRs on lysates, using specific primers targeting known bee pathogens (*Nosema apis*,  
232 *Nosema ceranae*, trypanosomatids, *Serratia marcescens*, fungi, as well as *Bifidobacterium* as  
233 initial validation that homogenates contained live members of the core gut microbiota).  
234 Lysates were produced by mixing 50  $\mu$ l of the homogenate with 50  $\mu$ l lysis buffer, five  $\mu$ l  
235 proteinase K (20 mg/ml) and five  $\mu$ l lysozyme (20 mg/ml) and incubating these mixes for 10  
236 min at 37 °C, 20 min at 55 °C and 10 min at 95 °C in a PCR machine. We then centrifuged  
237 these lysates for 5 min at 2000 g and used the supernatants as templates for PCR. We selected  
238 the homogenate that showed the least amplification of pathogen DNA.

239

240 For the CL\_13 and CL\_Bifi treatments, bacterial strains were inoculated from glycerol stocks  
241 and restreaked twice. Details on bacterial strains and culture conditions are reported in Table  
242 S4. We harvested bacterial cells and resuspended them in 1x PBS at an OD600 of 1. These  
243 suspensions were pooled in equal volumes in a falcon tube and pelleted by centrifugation at  
244 4000 g for 5 min, after which we resuspended the pooled pellet in 1.5 ml PBS, added glycerol  
245 to the final concentration of 20% and stored the final CL\_13 and CL\_Bifi inocula at -80 °C.

246

247

248

## 249 Automated behavioral tracking

250 Colonies of *Apis mellifera carnica* were reared at the University of Lausanne. Microbiota-  
251 depleted bees were produced as previously described (26, 27). Briefly, melanized dark-eyed  
252 pupae were individually extracted from capped brood cells with sterile forceps and placed in  
253 sterilized plastic containers lined with moist cotton. We performed nine experimental  
254 replicates of the automated behavioral tracking experiment. For each experimental replicate,  
255 we extracted four hundred pupae from one of nine different hives and placed them in 16  
256 sterile plastic boxes in groups of 25. We then kept these pupae in an incubator at 70% RH  
257 and 34.5 °C in the dark. Three days later, we used superglue to affix 1.6 mm<sup>2</sup> fiducial  
258 markers from the ARTag library (39) onto the thorax of all newly emerged workers that  
259 showed no sign of wing deformation. On the same day, we transferred these bees to each of  
260 16 new cup-cages built with a sterile plastic cup placed on top of a 100 mm petri dish, and  
261 provided them with their treatment solutions. To do this, we added 100 µl droplets of either a  
262 gut homogenate (CL) diluted 1:1 in sugar water (SW) or a 1:1 PBS:SW solution as control  
263 (MD) to the petri dish. Pollen and sugar water were provided *ad libitum*. Two days later we  
264 pooled these bees according to their treatment group and transferred ca. 100 bees per  
265 treatment into two pairs of plexiglas boxes (22.5 cm length x 13.5 cm width) closed by  
266 transparent covers 1.5 cm above the floor and connected by a (50 cm length x 1.9 cm  
267 diameter) plastic tube (Fig. 1A and Supplementary Movie 1). These pairs of plexiglas boxes  
268 were hosted within separate climate-controlled chambers and monitored by a pair of tracking  
269 devices (all technical specifications and code available at: [https://github.com/formicidae-](https://github.com/formicidae-tracker/)  
270 [tracker/](https://github.com/formicidae-tracker/)). We defined a nest chamber by keeping one box under a constant 70% RH and 30  
271 °C regime in the dark. In the foraging arena, climatic conditions cycled from 25°C and light  
272 during the day to 18°C and dark during the night (Fig. 1A). Transitions were initiated at  
273 04:00 and 16:00, and programmed to last for four hours, during which the climate system  
274 performed a linear interpolation between the two states. Each box contained a trough filled  
275 with 1 g of pollen and three 2 ml vials filled with SW. These SW feeders were continuously  
276 replaced during the experiment. Bees were left to acclimatize in their boxes for a few hours,  
277 after which we conducted behavioral tracking from 00:00 to 08:00 on the same day of the  
278 subsequent week (a total of 152 hours). During this time, the x,y coordinates and orientation  
279 of each tag was recorded six times per second. At the end of each experiment, we counted  
280 and removed dead bees. We then scanned the tags to retrieve the identity of each bee, flash  
281 froze the bees in liquid nitrogen and stored them at -80 °C until further processing.

282  
283 The tracking data were processed in FortStudio (<https://github.com/formicidae-tracker/>),  
284 where the body-length of each bee (front edge of clypeus – tip of abdomen; Fig. S10) was  
285 measured and polygons were drawn to define individual head and body regions (Fig. 1B).  
286 Data were subsequently processed using the R package FortMyrmidon  
287 (<https://github.com/formicidae-tracker/>). Contact events (i.e., the overlap of the body  
288 polygons) were saved along with the contact type (i.e., head to head, head to body, *etc*) and  
289 duration. Bees that interacted less than 2\*SD below the mean interaction count of the sub-  
290 colony were excluded from all behavioral analyses. Average speed and standard deviation in  
291 speed were calculated from individual trajectories (time-calibrated x,y coordinates).

292  
293 Statistical analyses were performed in R v4.1.0 (40). To assess the effect of the gut  
294 microbiota on behavioral variables (average values for each sub-colony) we ran paired *t* tests  
295 after checking that the differences between paired values were normally distributed using the  
296 Shapiro-Wilk normality test.

297  
298  
299



### 300 Production of gnotobiotic bees for RNA-sequencing

301 We collected six boxes of 25 pupae from each of 10 hives and kept them in an incubator at  
302 70% RH and 34.5 °C in the dark for two days. On the afternoon of the second day, we  
303 dissected one newly-emerged bee per box, homogenized their hindguts in 1 ml 1x PBS with  
304 0.75 - 1 mm sterile glass beads using a Fast-Prep24 5G homogenizer (MP Biomedicals) at 6  
305 m/s for 45 s. We then plated these homogenates on BHIA, CBA + blood and MRSA + 0.1%  
306 L-cys + 2% fructose growth media with the drop method and cultured them overnight in  
307 anaerobic and microaerophilic conditions. To minimize the risk of including contaminated  
308 bees in colonization experiments, the next day we excluded rearing boxes in which bacterial  
309 growth was observed for the tested bee, which led to the exclusion of two out of 60 boxes.  
310 Next, we transferred bees from each of the 58 remaining boxes into a corresponding sterile  
311 cage built with a 100 mm petri dish and an inverted sterile plastic cup of 3 dl.

312  
313 Four cages belonging to each of the ten hives were randomly assigned to one of four  
314 treatments. Bees were either (i) kept microbiota-depleted (MD) or colonized with (ii) the gut  
315 homogenate (CL) inoculum (iii) the community of 13 strains (CL\_13) inoculum, or (iv) the  
316 two strains of *Bifidobacterium asteroides* (CL\_Bifi) inoculum. Colonizations were performed  
317 three days after pupae extraction. After thawing the inocula on ice, we diluted them in 1X  
318 PBS and 1:1 in sugar water (SW). We placed three droplets of 100 µl colonization  
319 suspensions at the bottom of the cages so that bees would be inoculated by physical contact  
320 with the suspension and trophallaxis with other bees. MD bees were given only a 1:1  
321 PBS:SW solution (the extra cages that we produced for each hive were left MD to produce a  
322 surplus of these bees as a backup in case of contamination). Bees were provided with 1 g of  
323 sterile pollen and SW *ad libitum* and reared in an incubator at 70% RH and 30 °C in the dark.

324  
325 One week post-treatment, we anesthetized bees on ice and dissected their guts excluding the  
326 honey stomach, which is generally colonized by environmental microbes that do not  
327 represent the core gut microbiota (24, 41). We then flash-froze the heads and guts and stored  
328 them in liquid nitrogen.

### 329 330 Nucleic acid extraction from gut tissue

331 After having conducted the behavioral tracking experiment, we extracted DNA from the guts  
332 of 180 randomly selected bees (ten per replicate per treatment), for which we also performed  
333 metabolomics analyses of brain and hemolymph samples. We also performed one blank  
334 extraction (with no experimental tissue) per replicate (N=9) to identify and exclude  
335 laboratory reagents contaminants from 16S rRNA gene amplicon sequencing data (see  
336 below). The bees' abdomens were thawed on ice, and guts were dissected and homogenized  
337 in a FastPrep-24 5G homogenizer (MP Biomedicals) at 6 m/s for 45 s in 360 µl ATL buffer  
338 and 40 µl proteinase K (20 mg/ml) containing ca. 100 µl of 0.1 mm Zirconia/Silica beads  
339 (Carl Roth). These homogenates were digested at 56 °C overnight, after which DNA was  
340 extracted from half of each homogenate using a Qiagen BioSprint 96 robot with the BioSprint  
341 DNA Blood Kit following the manufacturer's instructions, including an RNase treatment  
342 step.

343  
344 For the RNA-seq experiment, we randomly selected three-four bees per treatment per hive  
345 (N=121) for DNA extraction of gut samples. Guts were thawed on ice and homogenized in a  
346 FastPrep-24 5G homogenizer (MP Biomedicals) at 6 m/s for 45 s in 1 ml 1X PBS containing  
347 ca. 100 µl of 0.1 mm Zirconia/Silica beads (Carl Roth). Half of the volume of these  
348 homogenates was used for DNA extraction while the remaining homogenate from 40 of these  
349 bees (one randomly selected bee per treatment per hive from 40 independent cages, from  
350 which we also obtained brain RNA-seq data; see below) was used for RNA extraction.

351 Nucleic acids were extracted with hot phenol protocols as previously described (26). We once  
352 more performed blank DNA extractions (with no experimental tissue) in parallel to control  
353 for laboratory reagent contaminations.

354

#### 355 Quantification of bacterial loads in the guts of gnotobiotic bees

356 We determined bacterial loads by qPCR using universal primers targeting the 16S rRNA  
357 gene as per Kešnerová *et al.* (27). qPCRs targeting the *Actin* gene (27) were used as controls  
358 of DNA quality. We also screened cDNA reverse-transcribed from gut RNA of the 40 bees  
359 that we selected for RNA-sequencing for the presence of Varroa destructor virus 1 (VDV-1)  
360 and deformed wing virus (DWV). There was no amplification of viral RNA from any of these  
361 samples. All qPCR reactions were carried out in 96-well plates on a StepOnePlus instrument  
362 (Applied Biosystems) following the protocols and using the primers reported in Kešnerová *et*  
363 *al.* (26, 27).

364

#### 365 16S rRNA gene amplicon-sequencing

366 The V4 region of the 16S rRNA gene was amplified following the Illumina 16S metagenomic  
367 sequencing preparation guide  
368 ([https://support.illumina.com/documents/documentation/chemistry\\_documentation/16s/16s-](https://support.illumina.com/documents/documentation/chemistry_documentation/16s/16s-metagenomic-library-prep-guide-15044223-b.pdf)  
369 [metagenomic-library-prep-guide-15044223-b.pdf](https://support.illumina.com/documents/documentation/chemistry_documentation/16s/16s-metagenomic-library-prep-guide-15044223-b.pdf)) and the protocols and primers reported in  
370 Kešnerová *et al.* (27). Amplicon-sequencing was performed on an Illumina MiSeq sequencer  
371 at the Genomic Technology Facility of the University of Lausanne. Sequencing was done for  
372 500 cycles, producing  $2 \times 250$ -bp reads.

373

#### 374 Analyses of 16 rRNA gene amplicon-sequencing data

375 We sequenced 16S rRNA gene amplicons from gut samples, bacterial inocula, negative PCR  
376 controls, and blank DNA extractions. We also included a mock community sample consisting  
377 of equal numbers of nine plasmids (pGEM®-T Easy vector; Promega) containing eight 16S  
378 rRNA gene sequences from honeybee gut symbionts and one from *E. coli*, which we used as  
379 internal standard to verify consistency between MiSeq runs. Raw sequencing data (deposited  
380 at the SRA Database under Accession no. PRJNA792398) were quality-controlled with  
381 FastQC (<http://www.bioinformatics.babraham.ac.uk/projects/fastqc/>) and primer sequences  
382 were removed with Cutadapt (42). We then continued the analysis using the Divisive  
383 Amplicon Denoising Algorithm 2 (DADA2) package v.1.20.0 (43) in R. All functions were  
384 run using the recommended parameters (<https://benjjneb.github.io/dada2/tutorial.html>) except  
385 that at the filtering step we truncated the F and R reads after 232 and 231 bp, respectively.  
386 We then set `randomize=TRUE` and `nbases=3e8` at the `learnErrors` step. We used the SILVA  
387 database (version 138) to classify the identified amplicon-sequence variants (ASVs). To  
388 complement the taxonomic classification based on the SILVA database, sequence variants  
389 were further assigned to major phylotypes of the bee gut microbiota as previously defined  
390 (27). Any unclassified ASV was removed with the “phyloseq” package version 1.36.0 (44),  
391 using the “subset taxa” function. We then used both the “prevalence” and “frequency”  
392 methods (method = “either”) in the R package “decontam” v.1.12.0 (45) to identify and  
393 remove contaminants introduced during laboratory procedures, using the negative PCR  
394 controls and the blank samples as reference.

395

#### 396 Analyses of combined 16S rRNA gene amplicon-sequence and qPCR data

397 To calculate absolute bacterial abundances of each ASV, the proportion of each ASV in each  
398 sample was multiplied by the total 16S rRNA gene copy number of each sample as measured  
399 by qPCR (27). To assess differences in community structure between treatments we ran  
400 ADONIS tests after calculating Bray-Curtis dissimilarities with the absolute ASV abundance  
401 matrix.

402

#### 403 Extraction of metabolites from tracked bees

404 We analyzed soluble metabolites in the brain and hemolymph from the random subset of 180  
405 tracked bees for which we also analyzed the gut microbiota. CL bees in this subset engaged  
406 in a greater number of head to head interactions than MD bees, consistent with our global  
407 analysis (Fig. S11; linear mixed-effects model fitted by REML with experimental replicate as  
408 random effect:  $n=174$ ,  $F_{1,164}=12.15$ ,  $P<0.001$ ). Brains were dissected from frozen bees,  
409 weighed on a microbalance, and refrozen at  $-80\text{ }^{\circ}\text{C}$  until extraction. Hemolymph ( $1\text{ }\mu\text{l}$ ) was  
410 taken from the thorax of thawed bees and refrozen at  $-80\text{ }^{\circ}\text{C}$  until extraction. Individual brain  
411 and hemolymph samples were extracted following a modified Bligh and Dyer protocol (46-  
412 48). Frozen brain tissue was ground with a motorized pestle for 30 s in  $100\text{ }\mu\text{l}$  of chilled (4:1)  
413 analytical grade methanol:ddH<sub>2</sub>O with 1 mM norlucine (Sigma Aldrich) standard.  
414 Hemolymph was extracted in the same mixture, omitting the tissue-grinding step. Samples  
415 were then extracted in a thermomixer (10 min, 2000 rpm,  $4\text{ }^{\circ}\text{C}$ ) and centrifuged (5 min,  
416 15000 rcf,  $4\text{ }^{\circ}\text{C}$ ). Supernatant was transferred to a new tube and kept chilled at  $-20\text{ }^{\circ}\text{C}$ , while  
417  $250\text{ }\mu\text{l}$  of cold (1:1) chloroform:methanol (Sigma Aldrich) was added to the sample. Samples  
418 were again extracted in the same manner, and the supernatants combined. Phase separation  
419 was achieved with  $200\text{ }\mu\text{l}$  ddH<sub>2</sub>O, followed by a fast vortex and centrifuge step. The top  
420 aqueous layer was removed and dried in a speedvac concentrator overnight at ambient  
421 temperature. The sample was derivatized with  $50\text{ }\mu\text{l}$  of 20 mg/ml methoxyamine  
422 hydrochloride in pyridine (Sigma Aldrich), for 90 min at  $33\text{ }^{\circ}\text{C}$  followed by silylation with  $50\text{ }\mu\text{l}$   
423 of MSTFA (Sigma Aldrich) for 120 min at  $45\text{ }^{\circ}\text{C}$ .

424

#### 425 GC-MS analysis of metabolites

426 Samples were analyzed on an Agilent 8890-5977B GC-MSD equipped with a Pal3  
427 autosampler that injected  $1\text{ }\mu\text{l}$  of sample onto a VF-5MS (30 m x 0.25 mm x 0.25 mm)  
428 column. The samples were injected with a split ratio of 15:1, helium flow rate of 1 ml/min  
429 and inlet temperature of  $280\text{ }^{\circ}\text{C}$ . The temperature was held for 2 min at  $125\text{ }^{\circ}\text{C}$ , raised at  $3\text{ }^{\circ}\text{C}/\text{min}$   
430 to  $150\text{ }^{\circ}\text{C}$ ,  $5\text{ }^{\circ}\text{C}/\text{min}$  to  $225\text{ }^{\circ}\text{C}$ , and  $15\text{ }^{\circ}\text{C}/\text{min}$  to  $300\text{ }^{\circ}\text{C}$  and held for 1.3 min. The  
431 MSD was run in scan mode from 50-500 Da at a frequency of 3.2 scan/s. Spectral  
432 deconvolution and compound identification was performed with Masshunter Workstation  
433 Unknown Analysis software (Agilent) and the NIST 2017 MS library. Best hits of compound  
434 identity are reported for spectra with a match factor greater than 85%. Identified metabolites  
435 were then manually mapped to metabolic pathways in the KEGG PATHWAY Database.  
436 Analyte abundances were calculated using the MassHunter Workstation Quantitative  
437 Analysis software (Agilent).

438

#### 439 Metabolomics analysis

440 Raw metabolite abundances were normalized to the internal standard and then to the sample  
441 mass (brains only). Low-quality samples and samples with an ISTD response  $<$  or  $>$  two SD  
442 from the batch mean were removed from the datasets. The normalized abundances were then  
443 transformed to z-scores. The impact of colonization on metabolite abundance was then  
444 calculated using a mixed integer linear model using the *lmm2met* package in R (49).  
445 Colonization was treated as a fixed effect, while the nine different experimental batches were  
446 treated as a random effect. One global batch term was used, as each step in the extraction and  
447 analysis pipeline was performed in the same paired batch fashion as in the automated  
448 behavioral tracking experiment. The significances of the effect sizes were calculated using a  
449 likelihood-ratio test and adjusted using the Benjamini–Hochberg (BH) procedure. We next  
450 performed separate linear mixed-effects models between the abundance (z-score) of each  
451 metabolite (independent variable) and the number of head to head interactions of each bee

452 (dependent variable). We considered the different experimental batches as a random effect  
453 and adjusted for multiple testing with the BH method.

454

#### 455 RNA-sequencing of gut and brain tissues

456 For RNA-sequencing, we randomly selected one bee per treatment per hive (40 total bees), so  
457 that all samples were independently reared in separate cages (no cage or hive effect). We  
458 sequenced RNA from the gut and brain of each individual. The heads were moved from  
459 liquid nitrogen into RNAlaterICE (Life Technologies) in a petri dish placed onto a metal  
460 plate chilled on ice. We immediately dissected the brain with sterile forceps, after carefully  
461 removing the hypopharyngeal glands, compound eyes and ocelli and further dissected the  
462 brain into three macro-regions by performing a horizontal incision across the midbrain  
463 through the posterior protocerebral lobe and two oblique incisions to separate the optic lobes  
464 from the rest of the brain (Fig. 3A), using needles. The resulting regions were: the optic lobes  
465 (OL), the mushroom body region (MB), and the lower part of the midbrain, containing the  
466 antennal lobes and the subesophageal ganglion (AL). RNA extractions of brain regions were  
467 performed with the Arcturus PicoPure RNA Isolation Kit (Applied Biosystems) according to  
468 the manufacturer's specifications, including a DNase treatment (Qiagen) to remove genomic  
469 DNA. Brain-region samples were transferred to the kit's incubation buffer and homogenized  
470 for 30 s with a motorized pestle.

471

472 The quality of both brain and gut RNA extractions was verified using a Fragment Analyzer  
473 (Advanced Analytical). RNA-sequencing libraries were prepared with the KAPA stranded  
474 mRNA kit (Roche) following the manufacturer's protocol, except that we appended TruSeq  
475 unique dual indexes (UDIs, Illumina) instead of the adapters provided by the kit to better  
476 control for index hopping during sequencing. We always performed RNA extractions and  
477 library preparations for all bees from each hive/experimental replicate at the same time so as  
478 to only have one combined batch factor to control for. However, four bees had to be re-  
479 processed as one of the tissues failed at library preparation. Hence, we accounted for an 11th  
480 RNA extraction / library preparation batch during analysis. Each sample was sequenced twice  
481 in separate sequencing lanes on a HiSeq 4000 sequencer (Illumina) at the Genomic  
482 Technology Facility of the University of Lausanne, producing single-end 150 bp reads.

483

#### 484 RNA-sequencing data analyses

485 Read quality was assessed with FastQC ([http://www.bioinformatics.babraham.ac.uk/](http://www.bioinformatics.babraham.ac.uk/projects/fastqc/)  
486 [projects/fastqc/](http://www.bioinformatics.babraham.ac.uk/projects/fastqc/)). We used Trimmomatic (50) to remove adapters and low-quality bases with  
487 the following parameters: LEADING: 10 (trim the leading nucleotides until quality > 10),  
488 TRAILING: 10 (trim the trailing nucleotides until quality > 10), SLIDINGWINDOW: 4:20  
489 (trim the window of size four for reads with local quality below a score of 20), and MINLEN:  
490 80 (discard reads shorter than 80 bases). Reads were then aligned with STAR v.2.5.4b (51) to  
491 the honeybee genome (*Apis mellifera* assembly HAv3.1 (52)). The two bam files belonging  
492 to each sample were merged with Samtools merge (53). Mapped reads were then converted  
493 into raw read counts with the htseq-count script  
494 (<http://www.huber.embl.de/users/anders/HTSeq/doc/count.html>). Two gut samples and four  
495 brain region samples (two OL, one AL, one MB) were not included in down-stream analyses  
496 because they either failed during library preparation or represented clear outliers, with less  
497 than 10% of reads mapping to the honeybee genome. We used the filterByExpr function in  
498 edgeR (54) to filter out genes that were not represented by at least 20 reads in a single  
499 sample. We then used the *Limma* Bioconductor package (55) for analyses of differential  
500 expression. For the gut we used the formula 0 + Treatment + Batch, whereas for the brain we  
501 used the formula 0 + group + Batch, where "group" represented every possible combination  
502 of brain region and treatment group and "Batch" represented the different experimental and



503 RNA-seq library preparation batches. We accounted for the random effect of sampling  
504 multiple brain regions from the same individuals using the *duplicateCorrelation* function.  
505 The three different brain regions showed very distinct patterns of gene expression, indicating  
506 the precise dissection of the brain and quantification of region-specific gene expression (Fig.  
507 S12). We therefore performed the desired contrasts between brain regions and treatments,  
508 overall and within each brain region independently. *P* values of differential expression  
509 analyses were corrected for multiple testing with a false discovery rate (FDR) of 5%.

510  
511 To perform Gene Ontology (GO) enrichment analyses we retrieved GO terms using biomaRt  
512 (*amellifera\_eg\_gene* dataset; (56)). We used a hypergeometric test implemented in the R  
513 Bioconductor package *GOstats* v.2.58.0 (57) to evaluate the differentially expressed gene  
514 lists for GO term associations, using the full genome as background and retaining GO terms  
515 with  $P < 0.05$ . *GOFigure!* (58) was subsequently used to reduce redundancy in significant GO  
516 terms and summarize results by semantic similarity, using a similarity threshold of 0.8.

517  
518

## 519 References

- 520 1. E. O. Wilson, *Sociobiology: The new synthesis*. (Harvard University Press, 1975).
- 521 2. J. M. Diamond, D. Ordunio, *Guns, germs, and steel*. (Books on Tape, 1999).
- 522 3. I. D. Couzin, J. Krause, et al., Self-organization and collective behavior in vertebrates. *Adv.*  
523 *Study. Behav.* **32**, 10-1016 (2003).
- 524 4. L. Keller, Adaptation and the genetics of social behaviour. *Philos. Trans. R. Soc. Lond., Ser.*  
525 *B: Biol. Sci.* **364**, 3209-3216 (2009).
- 526 5. T. Kay, L. Keller, L. Lehmann, The evolution of altruism and the serial rediscovery of the  
527 role of relatedness. *Proc. Natl. Acad. Sci. USA* **117**, 28894-28898 (2020).
- 528 6. J. F. Cryan, T. G. Dinan, Mind-altering microorganisms: the impact of the gut microbiota on  
529 brain and behaviour. *Nat. Rev. Neurosci.* **13**, 701-712 (2012).
- 530 7. K. V. A. Johnson, K. R. Foster, Why does the microbiome affect behaviour? *Nat. Rev.*  
531 *Microbiol.* **16**, 647-655 (2018).
- 532 8. E. Sherwin, S. R. Bordenstein, J. L. Quinn, T. G. Dinan, J. F. Cryan, Microbiota and the  
533 social brain. *Science* **366**, eaar2016 (2019).
- 534 9. L. Desbonnet, G. Clarke, F. Shanahan, T. G. Dinan, J. F. Cryan, Microbiota is essential for  
535 social development in the mouse. *Mol. Psychiatry* **19**, 146-148 (2014).
- 536 10. G. Sharon *et al.*, Human gut microbiota from autism spectrum disorder promote behavioral  
537 symptoms in mice. *Cell* **177**, 1600-1618 (2019).
- 538 11. M. Zhang *et al.*, A quasi-paired cohort strategy reveals the impaired detoxifying function of  
539 microbes in the gut of autistic children. *Sci. Adv.* **6**, eaba3760 (2020).
- 540 12. W.-L. Wu *et al.*, Microbiota regulate social behaviour via stress response neurons in the brain.  
541 *Nature*, 1-6 (2021).
- 542 13. H. E. Vuong, J. M. Yano, T. C. Fung, E. Y. Hsiao, The microbiome and host behavior. *Annu.*  
543 *Rev. Neurosci.* **40**, 21-49 (2017).
- 544 14. A. E. Douglas, Simple animal models for microbiome research. *Nat. Rev. Microbiol.* **17**, 764-  
545 775 (2019).
- 546 15. C. E. Schretter, Links between the gut microbiota, metabolism, and host behavior. *Gut*  
547 *microbes*, 1-4 (2019).
- 548 16. J. Liberti, P. Engel, The gut microbiota — brain axis of insects. *Curr. Opin. Insect Sci.* **39**, 6-  
549 13 (2020).
- 550 17. M. P. O'Donnell, B. W. Fox, P.-H. Chao, F. C. Schroeder, P. Sengupta, A neurotransmitter  
551 produced by gut bacteria modulates host sensory behaviour. *Nature* **583**, 415-420 (2020).
- 552 18. E. O. Wilson, *The insect societies*. (Harvard University Press, 1971).
- 553 19. B. Hölldobler, E. O. Wilson, *The ants*. (Harvard University Press, 1990).
- 554 20. S. H. Choi *et al.*, Individual variations lead to universal and cross-species patterns of social



- 555 behavior. *Proc. Natl. Acad. Sci. USA* **117**, 31754-31759 (2020).
- 556 21. A. C. Geffre *et al.*, Honey bee virus causes context-dependent changes in host social  
557 behavior. *Proc. Natl. Acad. Sci. USA* **117**, 10406-10413 (2020).
- 558 22. W. K. Kwong, N. A. Moran, Gut microbial communities of social bees. *Nat. Rev. Microbiol.*  
559 **14**, 374-384 (2016).
- 560 23. G. Bonilla-Rosso, P. Engel, Functional roles and metabolic niches in the honey bee gut  
561 microbiota. *Curr. Opin. Microbiol.* **43**, 69-76 (2018).
- 562 24. K. Raymann, N. A. Moran, The role of the gut microbiome in health and disease of adult  
563 honey bee workers. *Curr. Opin. Insect Sci.* **26**, 97-104 (2018).
- 564 25. H. Zheng, J. E. Powell, M. I. Steele, C. Dietrich, N. A. Moran, Honeybee gut microbiota  
565 promotes host weight gain via bacterial metabolism and hormonal signaling. *Proc. Natl.*  
566 *Acad. Sci. USA* **114**, 4775-4780 (2017).
- 567 26. L. Kešnerová *et al.*, Disentangling metabolic functions of bacteria in the honey bee gut. *PLoS*  
568 *Biol.* **15**, e2003467 (2017).
- 569 27. L. Kešnerová *et al.*, Gut microbiota structure differs between honeybees in winter and  
570 summer. *The ISME journal* **14**, 801-814 (2020).
- 571 28. D. P. Mersch, A. Crespi, L. Keller, Tracking individuals shows spatial fidelity is a key  
572 regulator of ant social organization. *Science* **340**, 1090-1093 (2013).
- 573 29. N. Stroeymeyt *et al.*, Social network plasticity decreases disease transmission in a eusocial  
574 insect. *Science* **362**, 941-945 (2018).
- 575 30. A. P. de Groot, Protein and amino acid requirements of the honeybee (*Apis mellifica* L.).  
576 *Physiol. Comp. Oecol.* **3**, 197-285 (1953).
- 577 31. J.-M. Billard, D-Amino acids in brain neurotransmission and synaptic plasticity. *Amino Acids*  
578 **43**, 1851-1860 (2012).
- 579 32. P. Marcaggi, D. Attwell, Role of glial amino acid transporters in synaptic transmission and  
580 brain energetics. *Glia* **47**, 217-225 (2004).
- 581 33. S. L. Gage, S. Calle, N. Jacobson, M. Carroll, G. DeGrandi-Hoffman, Pollen alters amino  
582 acid levels in the honey bee brain and this relationship changes with age and parasitic stress.  
583 *Front. Neurosci.* **14**, 231 (2020).
- 584 34. T. Kawase *et al.*, Gut microbiota of mice putatively modifies amino acid metabolism in the  
585 host brain. *Br. J. Nutr.* **117**, 775-783 (2017).
- 586 35. E. Socha, M. Koba, P. Koslinski, Amino acid profiling as a method of discovering biomarkers  
587 for diagnosis of neurodegenerative diseases. *Amino Acids* **51**, 367-371 (2019).
- 588 36. C. G. Galizia, D. Eisenhardt, M. Giurfa (eds.), *Honeybee neurobiology and behavior: a*  
589 *tribute to Randolph Menzel*. (Springer Science & Business Media, 2011).
- 590 37. R. Menzel, The honeybee as a model for understanding the basis of cognition. *Nat. Rev.*  
591 *Neurosci.* **13**, 758-768 (2012).
- 592 38. K. M. Ellegaard, P. Engel, Genomic diversity landscape of the honey bee gut microbiota. *Nat.*  
593 *Commun.* **10**, 446 (2019).
- 594 39. F. Bruno, A. Angilica, F. Cosco, M. L. Luchi, M. Muzzupappa, Mixed prototyping  
595 environment with different video tracking techniques. In *IMProVe 2011 International*  
596 *Conference on Innovative Methods in Product Design*, 105-113 (2011).
- 597 40. R Core Team, R: A language and environment for statistical computing. *R Foundation for*  
598 *Statistical Computing, Vienna, Austria*. URL <http://www.R-project.org/>, (2020).
- 599 41. K. E. Anderson, P. A. P. Rodrigues, B. M. Mott, P. Maes, V. Corby-Harris, Ecological  
600 succession in the honey bee gut: shift in *Lactobacillus* strain dominance during early adult  
601 development. *Microb. Ecol.* **71**, 1008-1019 (2016).
- 602 42. M. Martin, Cutadapt removes adapter sequences from high-throughput sequencing reads.  
603 *EMBnet. J.* **17**, 10-12 (2011).
- 604 43. B. J. Callahan *et al.*, DADA2: high-resolution sample inference from Illumina amplicon data.  
605 *Nat. Methods* **13**, 581-583 (2016).
- 606 44. P. J. McMurdie, S. Holmes, phyloseq: an R package for reproducible interactive analysis and  
607 graphics of microbiome census data. *Plos One* **8**, e61217 (2013).
- 608 45. N. M. Davis, D. M. Proctor, S. P. Holmes, D. A. Relman, B. J. Callahan, Simple statistical  
609 identification and removal of contaminant sequences in marker-gene and metagenomics data.  
610 *Microbiome* **6**, 1-14 (2018).

- 611 46. S. Patassini *et al.*, Identification of elevated urea as a severe, ubiquitous metabolic defect in  
612 the brain of patients with Huntington's disease. *Biochem. Biophys. Res. Commun.* **468**, 161-  
613 166 (2015).
- 614 47. C. Gonzalez-Riano, A. Garcia, C. Barbas, Metabolomics studies in brain tissue: A review. *J.*  
615 *Pharm. Biomed. Anal.* **130**, 141-168 (2016).
- 616 48. J. E. L. Belle, N. G. Harris, S. R. Williams, K. K. Bhakoo, A comparison of cell and tissue  
617 extraction techniques using high-resolution <sup>1</sup>H-NMR spectroscopy. *NMR Biomed.* **15**, 37-44  
618 (2002).
- 619 49. K. Wanichthanarak, S. Jeamsripong, N. Pornputtapong, S. Khoomrung, Accounting for  
620 biological variation with linear mixed-effects modelling improves the quality of clinical  
621 metabolomics data. *Comput. Struct. Biotechnol. J.* **17**, 611-618 (2019).
- 622 50. A. M. Bolger, M. Lohse, B. Usadel, Trimmomatic: a flexible trimmer for Illumina sequence  
623 data. *Bioinformatics* **30**, 2114-2120 (2014).
- 624 51. A. Dobin *et al.*, STAR: ultrafast universal RNA-seq aligner. *Bioinformatics* **29**, 15-21 (2013).
- 625 52. A. Wallberg *et al.*, A hybrid de novo genome assembly of the honeybee, *Apis mellifera*, with  
626 chromosome-length scaffolds. *BMC Genomics* **20**, 1-19 (2019).
- 627 53. H. Li *et al.*, The Sequence Alignment/Map format and SAMtools. *Bioinformatics* **25**, 2078-  
628 2079 (2009).
- 629 54. M. D. Robinson, D. J. McCarthy, G. K. Smyth, edgeR: a Bioconductor package for  
630 differential expression analysis of digital gene expression data. *Bioinformatics* **26**, 139-140  
631 (2010).
- 632 55. M. E. Ritchie *et al.*, limma powers differential expression analyses for RNA-sequencing and  
633 microarray studies. *Nucleic Acids Res.* **43**, e47 (2015).
- 634 56. S. Durinck, P. T. Spellman, E. Birney, W. Huber, Mapping identifiers for the integration of  
635 genomic datasets with the R/Bioconductor package biomaRt. *Nat. Protoc.* **4**, 1184-1191  
636 (2009).
- 637 57. S. Falcon, R. Gentleman, Using GOstats to test gene lists for GO term association.  
638 *Bioinformatics* **23**, 257-258 (2007).
- 639 58. M. J. Reijnders, R. M. Waterhouse, Summary visualisations of Gene Ontology terms with  
640 GO-Figure! *Front. in Bioinform.* **1**, 638255 (2021).

641

642 **Acknowledgements:** We would like to thank Christine La Mendola and Catherine Berney for  
643 their technical support with RNA extraction and library preparation of honeybee brain  
644 samples, Théodora Steiner for continuous support in the laboratory, Matthias Rüegg and  
645 Alexandre Tuleu for technical assistance with the automated tracking system and Jule  
646 Wermerssen for the bee drawing in Fig. 1A. The two equally contributing senior authors  
647 flipped a coin to determine last authorship. This work was funded by the University of  
648 Lausanne, the European Union's Horizon 2020 research and innovation programme under the  
649 Marie Skłodowska-Curie grant agreement BRAIN (no. 797113) to Joanito Liberti, by a HFSP  
650 Young Investigator grant (RGY0077/2016), an ERC Starting Grant (MicroBeeOme), and a  
651 Swiss National Science Foundation grant (31003A 160345) to Philipp Engel, and by a ERC  
652 Advanced Grant (resiliANT, no. 741491) to Laurent Keller.

653

654 **Author contributions:** JL, PE and LKel conceived and designed the study. JL, PE and LKel  
655 acquired fundings. PE and LKel supervised the research. JL and TK performed the automated  
656 behavioral tracking experiment. TK performed automated behavioral tracking data analyses  
657 with assistance from JL and TOR. JL performed statistical analyses. JL performed  
658 microbiological preparations and gnotobiotic manipulations with assistance from LK, TK,  
659 AC and ETF. JL extracted DNA and JL and LK performed qPCR analyses. JL performed  
660 amplicon-sequencing and data analyses. JL performed gut and brain dissections and  
661 hemolymph collection. AQ performed metabolite extractions, GC-MS runs and  
662 metabolomics data analyses with assistance from JL. JL extracted RNA and analyzed RNA-

663 sequencing data. LK performed RNA-sequencing library preparations. JL, TK and AQ  
664 plotted the graphs. JL, TK, PE and LKel drafted the manuscript. All authors contributed to  
665 interpreting the data and editing subsequent drafts of the manuscript.

666

667 **Competing interests:** Authors declare no competing interests.

668

669 **Data and materials availability:** Raw RNA-sequencing data have been deposited in NCBI's  
670 Gene Expression Omnibus and are accessible through GEO Series accession number  
671 GSE192784 (<https://www.ncbi.nlm.nih.gov/geo/query/acc.cgi?acc=GSE192784>), while raw  
672 amplicon-sequence data are available on Sequence Read Archive (SRA) under accession  
673 PRJNA792398. Raw data tables, metadata and codes are available on GitHub at  
674 [https://github.com/JoanitoLiberti/The-gut-microbiota-affects-the-social-network-of-](https://github.com/JoanitoLiberti/The-gut-microbiota-affects-the-social-network-of-honeybees)  
675 [honeybees](https://github.com/JoanitoLiberti/The-gut-microbiota-affects-the-social-network-of-honeybees). Additional input files required to reproduce the automated behavioral tracking  
676 analyses are available on Zenodo at: <https://doi.org/10.5281/zenodo.5797980>.
