# Supplementary material for: The gut microbiota affects the social network of honeybees
Source: bioRxiv or medRxiv preprint supplement (doi:10.1101/2021.12.31.474534), 2022-01-01
Supplement: Supplementary file [file media-1.pdf]

PCoA of Bray–Curtis dissimilarities

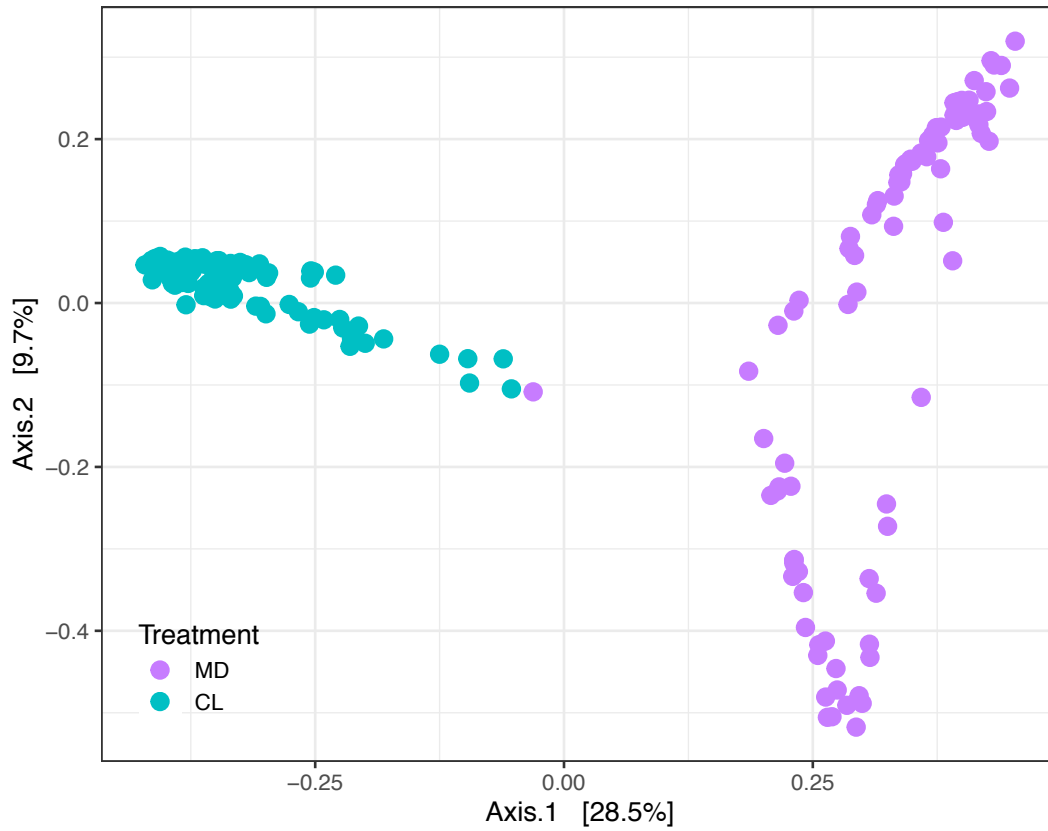

23

24 **Fig. S1.**

25 Principal Coordinate Analysis of Bray-Curtis dissimilarities between gut microbiota profiles in  
26 the automated tracking experiment. The ordination was performed on Bray-Curtis dissimilarities  
27 calculated from a matrix of absolute bacterial abundances of each amplicon-sequence variant  
28 (ASV) in each sample. This was obtained by multiplying the relative proportion of each ASV in  
29 each sample by the total number of 16S rRNA gene copies in the sample.

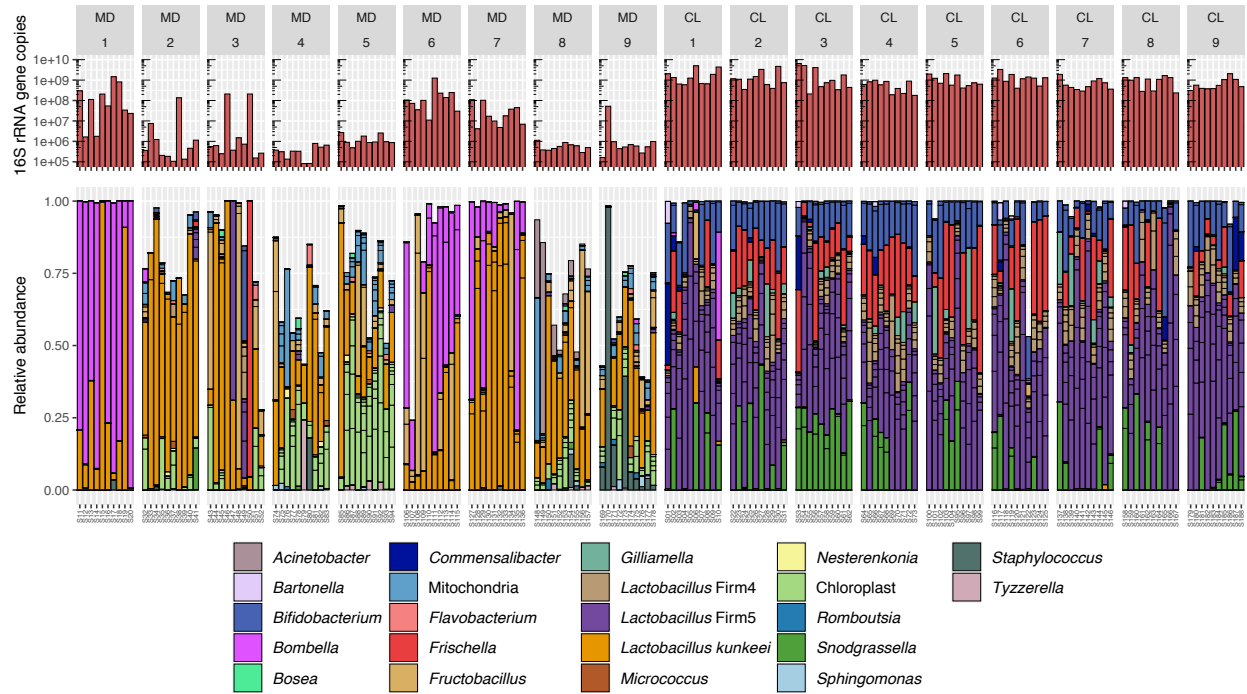

30

31 **Fig. S2.**

32 Bacterial loads and microbiota composition in the guts of bees in the automated tracking  
 33 experiment. The upper barplots depict the number of 16S rRNA gene copies measured by qPCR  
 34 with universal bacterial primers. Lower stacked bars indicate the relative abundance of  
 35 community members. Multiple ASVs can have the same classification (color) and are separated  
 36 by horizontal ticks. For ease of visualization, the stacked bars show only ASVs that had a  
 37 minimum of 1% relative abundance in five samples.

38

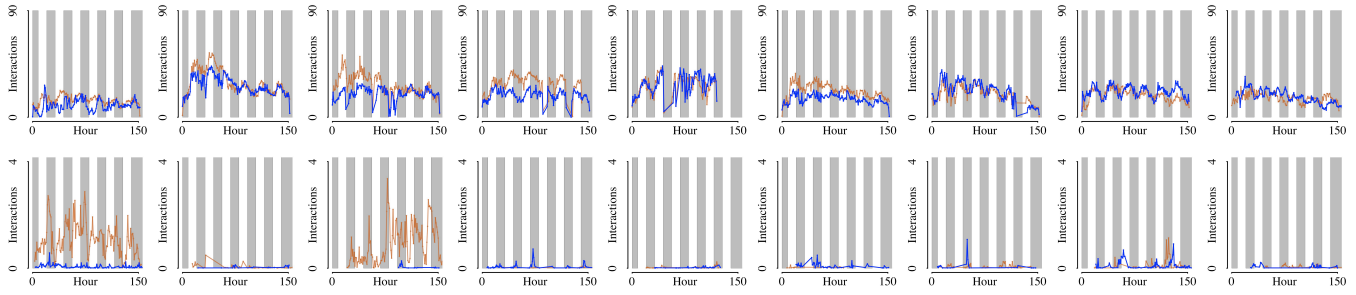

39

40 **Fig. S3.**

41 Line plots showing the number of head to head interactions per bee per hour in the automated  
42 behavioral tracking experiment. Columns correspond to experimental replicates. Top row = nest  
43 arena; bottom row = foraging arena. Brown lines = CL sub-colonies; blue lines = MD sub-  
44 colonies. Background bars show night (gray) and day (white). The expected circadian pattern of  
45 interaction frequency is apparent.

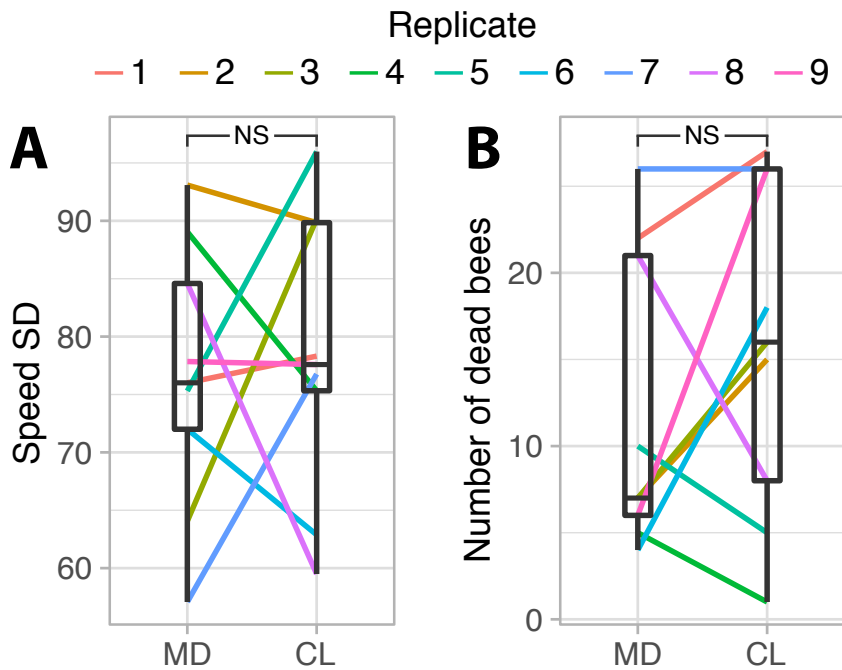

46

47 **Fig. S4.**

48 Standard deviation of speed (A) and mortality of tracked bees (B). Lines connect paired colonies  
 49 in each experimental replicate. Boxplots show the median and first and third quartiles, while  
 50 upper and lower whiskers report largest and lowest values within 1.5 times the interquartile  
 51 ranges above and below the 75th and 25th percentiles, respectively. NS = not significant.

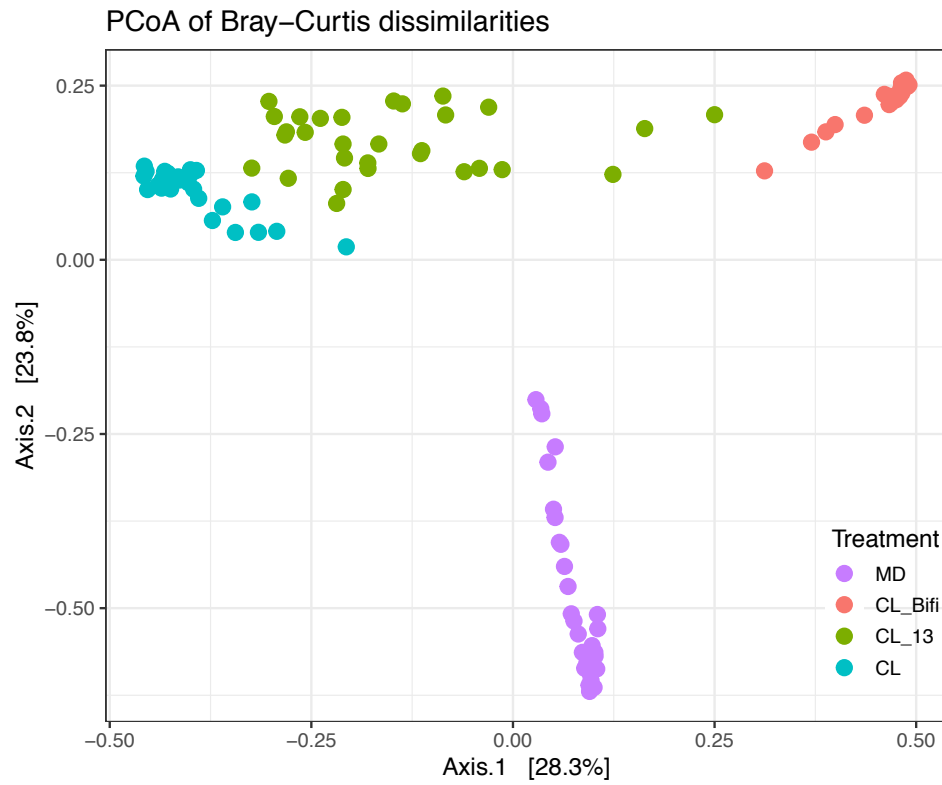

52

53 **Fig. S5.**

54 Principal Coordinate Analysis of Bray-Curtis dissimilarities between gut microbiota profiles in  
 55 the RNA-sequencing experiment. Bray-Curtis dissimilarities were calculated from the absolute  
 56 bacterial abundances of each ASV in each sample.

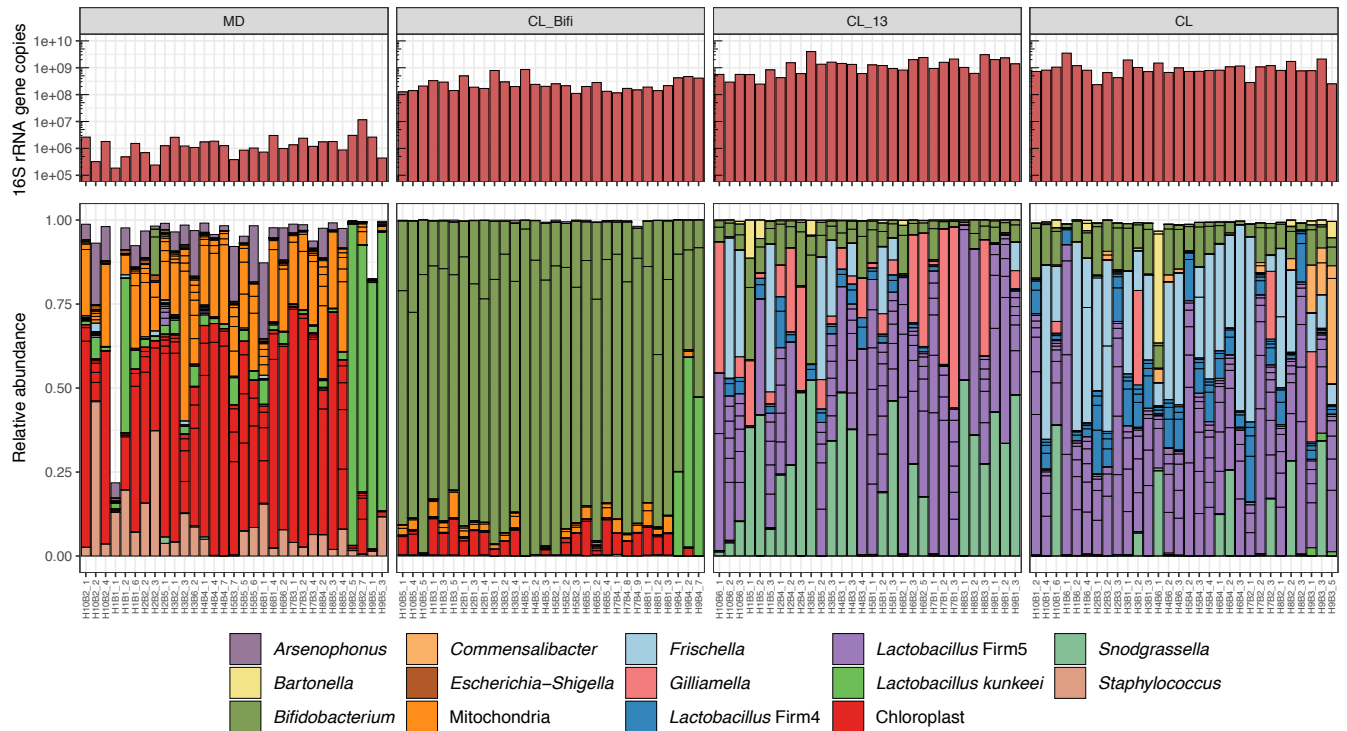

58

59 **Fig. S6.**

60 Bacterial loads and microbiota composition in the guts of bees from the RNA-sequencing  
 61 experiment. The upper barplots depict the number of 16S rRNA gene copies measured by qPCR  
 62 with universal bacterial primers. Lower stacked bars indicate the relative abundance of  
 63 community members. Note that multiple amplicon-sequence variants (ASVs) can have the same  
 64 classification (color) and are separated by horizontal ticks. For ease of visualization, the stacked  
 65 bars show only ASVs that had a minimum of 1% relative abundance in two samples.

66

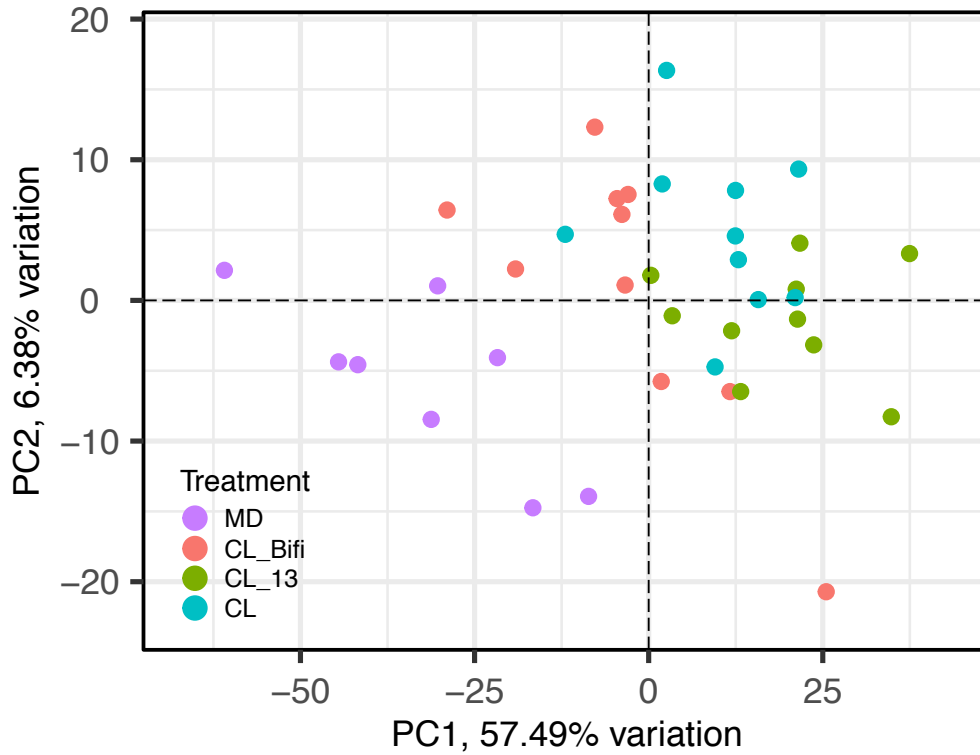

67

68 **Fig. S7.**

69 Principal Component Analysis of differentially expressed genes in honeybee gut samples. The  
70 ordination clusters the samples based on the expression (trimmed mean of M values (TMM)  
71 normalized counts) of 4,988 DEGs identified in contrasts of colonized treatments and  
72 microbiota-depleted controls. Samples are color-coded by gut microbiota treatment group.



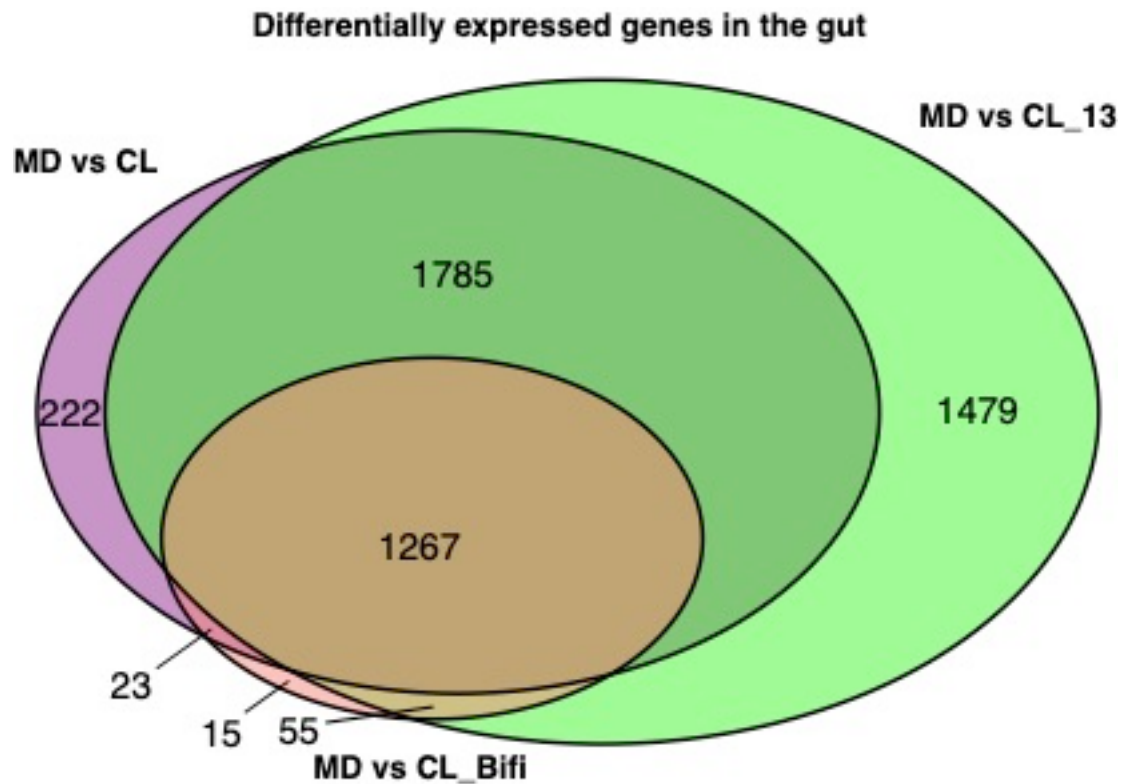

74

75 **Fig. S8.**

76 Venn diagram of DEGs in the gut. The diagrams report overlap in differentially expressed genes  
 77 between contrasts of colonized treatments and microbiota-depleted controls in the gut. Note that  
 78 additional comparisons between MD vs. both CL<sub>13</sub> and CL and between MD and all  
 79 colonization treatments combined (CL<sub>13</sub>, CL and CL<sub>Bifi</sub>) have been omitted here for ease of  
 80 visualization. See Table S5 for complete DEG lists.

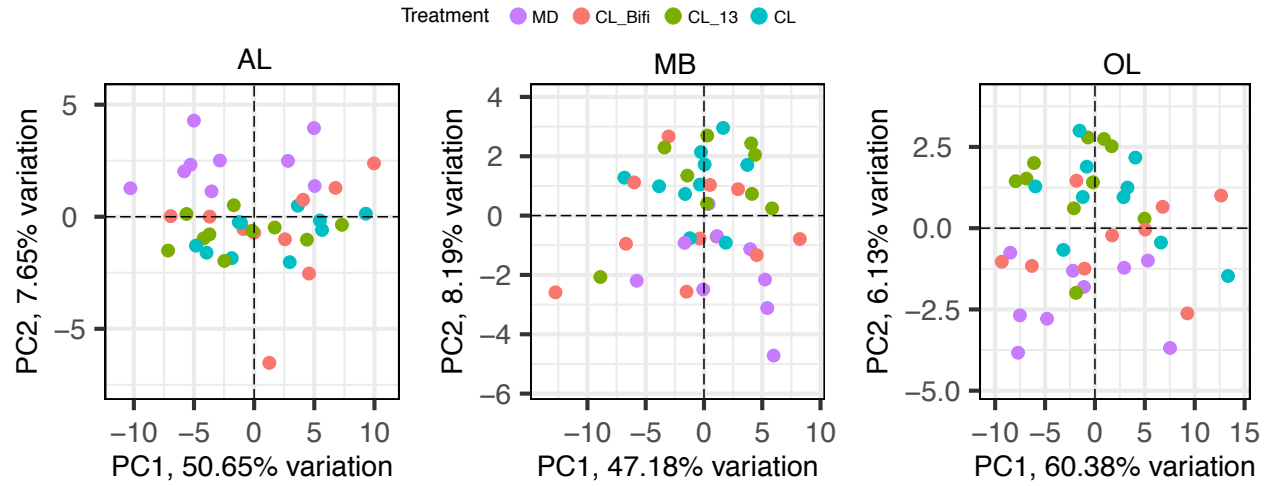

81

82 **Fig. S9.**

83 Principal Component Analyses of brain-region-specific expression of genes altered by the  
 84 honeybee gut microbiota. The ordinations cluster samples based on the expression (TMM-  
 85 normalized counts) of the 91 differentially expressed genes identified across whole-brain and  
 86 region-specific contrasts of all colonized treatments against microbiota-depleted controls.  
 87 Samples are color-coded by gut microbiota treatment group. AL = antennal lobes and  
 88 suboesophageal ganglion, MB = mushroom bodies, OL = optic lobes.

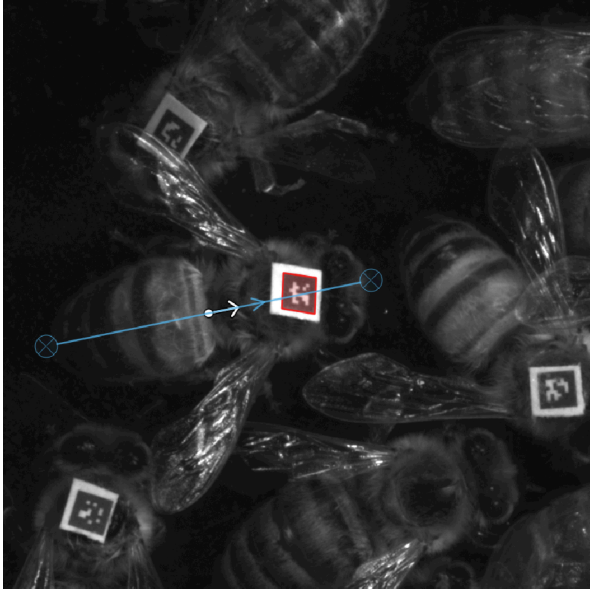

89

90 **Fig. S10.**

91 Example of the post-processing procedure to determine the orientation of a tracked bee. In  
92 FortStudio, a line was drawn from the tip of the abdomen to the front edge of the clypeus to  
93 derive the orientation of the tag relative to the body of the bee.

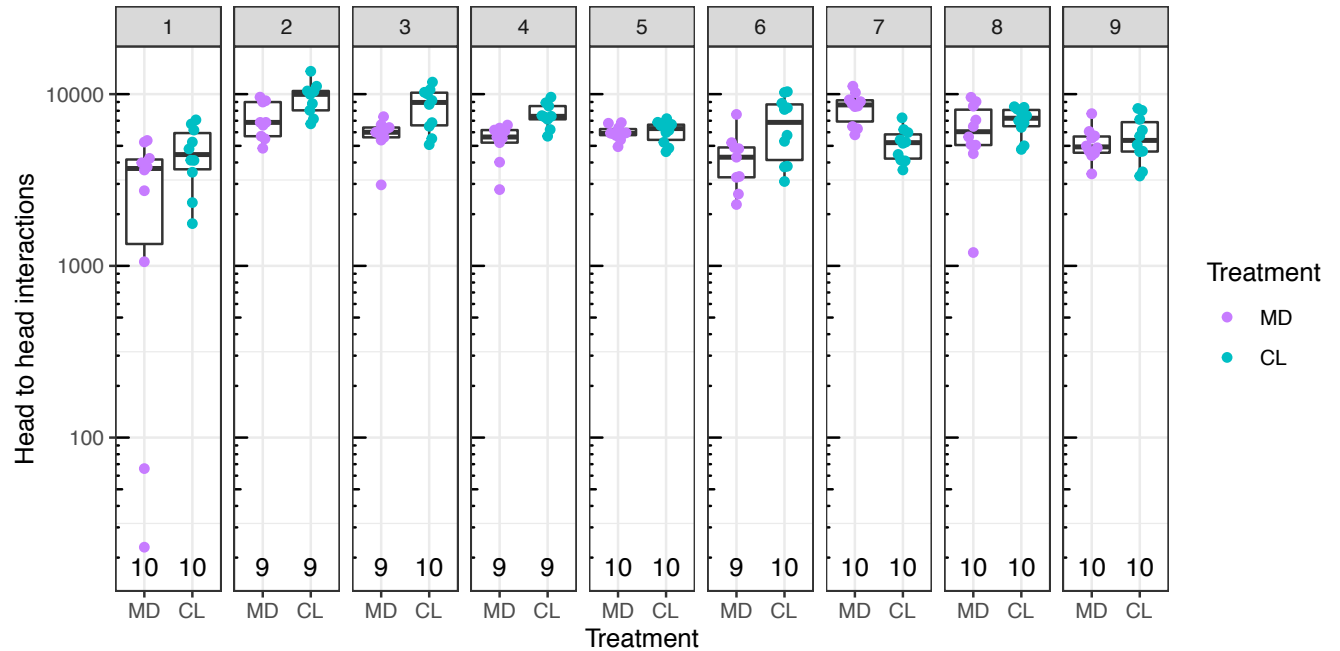

94

95 **Fig. S11.**

96 Social interactions in a subset of tracked bees by gut microbiota treatment group and  
 97 experimental replicate. The plot shows the number of head to head interactions of the tracked  
 98 bees for which we also obtained gut microbiota and metabolome data. For six of these 180 bees  
 99 the number of head to head interactions could not be retrieved due to deterioration of the tags at  
 100 the end of the week of tracking.

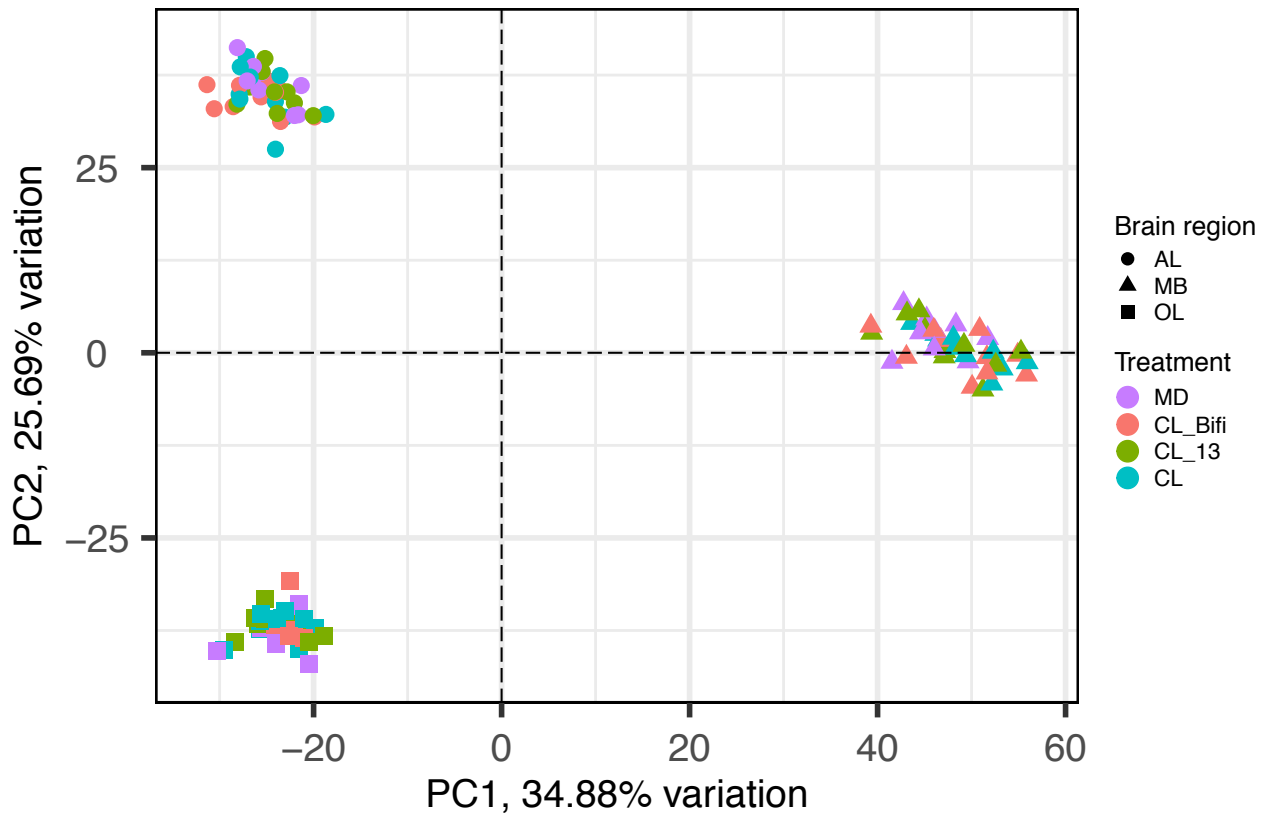

101

102 **Fig. S12.**

103 Principal Component Analysis of overall gene expression of brain samples. The ordination  
 104 clusters samples based on the expression (TMM-normalized counts) of 10,493 genes retained  
 105 after filtering out those with low expression and removing the experimental batch effect. Color  
 106 indicates gut microbiota treatment group and shape indicates the different brain regions. AL =  
 107 antennal lobes and subesophageal ganglion, MB = mushroom bodies, OL = optic lobes.

108 **Table S1. (separate file)**  
109 Results of differential metabolite abundance between gut microbiota treatments in the automated  
110 behavioral tracking experiment. Brain and hemolymph results are presented in separate sheets.  
111 For each metabolite the table shows the effect size and *P* value of the colonization treatment and  
112 the injection order in the GC-MS, as well as the BH-adjusted *P* values for the colonization  
113 treatment.  
114

115 **Table S2. (separate file)**  
116 Metabolite retention time, library identification, and functional categorization of the metabolites  
117 detected in the brain and hemolymph of bees in the automated behavioral tracking experiment,  
118 showed in separate sheets.  
119

120 **Table S3. (separate file)**  
121 Results of linear mixed effects models between abundance (z-scores) of individual metabolites  
122 and the number of head to head interactions of individual bees in the automated behavioral  
123 tracking experiment. For each metabolite, separate columns report the *F* value, the *P* value and  
124 the adjusted *P* value after BH-correction. Results for brain and hemolymph are shown in separate  
125 sheets.  
126

127 **Table S4. (separate file)**  
128 Identity and culture conditions of the strains used to produce the CL\_13 and CL\_Bifi inocula.  
129

130 **Table S5. (separate file)**  
131 Results of differential gene expression analysis of gut samples. Separate sheets report the lists of  
132 differentially expressed genes of different pair-wise comparisons.  
133

134 **Tables S6. (separate file)**  
135 Results of differential gene expression analysis of brain samples. Separate sheets report the lists  
136 of differentially expressed genes of different pair-wise comparisons.  
137

138 **Table S7. (separate file)**  
139 Results of gene ontology enrichment analysis of the list of 91 DEGs identified in the brain.  
140

141 **Supplementary Movie 1. (separate file)**  
142 Monitoring of social interactions under an automated behavioral tracking system. The video  
143 shows the nest box of one sub-colony. In this video orange lines connect bees whenever any kind  
144 of interaction occurs: body to body, head to head or head to body. Playback speed is 4x the  
145 actual speed.
